# Supplementary material for: Review article: Dynamical systems, algebraic topology and the climate sciences
Source: Copernicus journal article supplement (doi:10.5194/npg-30-399-2023), 2023-10-05

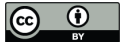

*Supplement of*

**Review article: Dynamical systems, algebraic topology and the climate sciences**

**Michael Ghil and Denisse Sciamarella**

*Correspondence to:* Michael Ghil ([ghil@atmos.ucla.edu](mailto:ghil@atmos.ucla.edu)) and Denisse Sciamarella ([denisse.sciamarella@cnr.fr](mailto:denisse.sciamarella@cnr.fr))

The copyright of individual parts of the supplement might differ from the article licence.

*Pullback attraction to  $A(\omega)$*

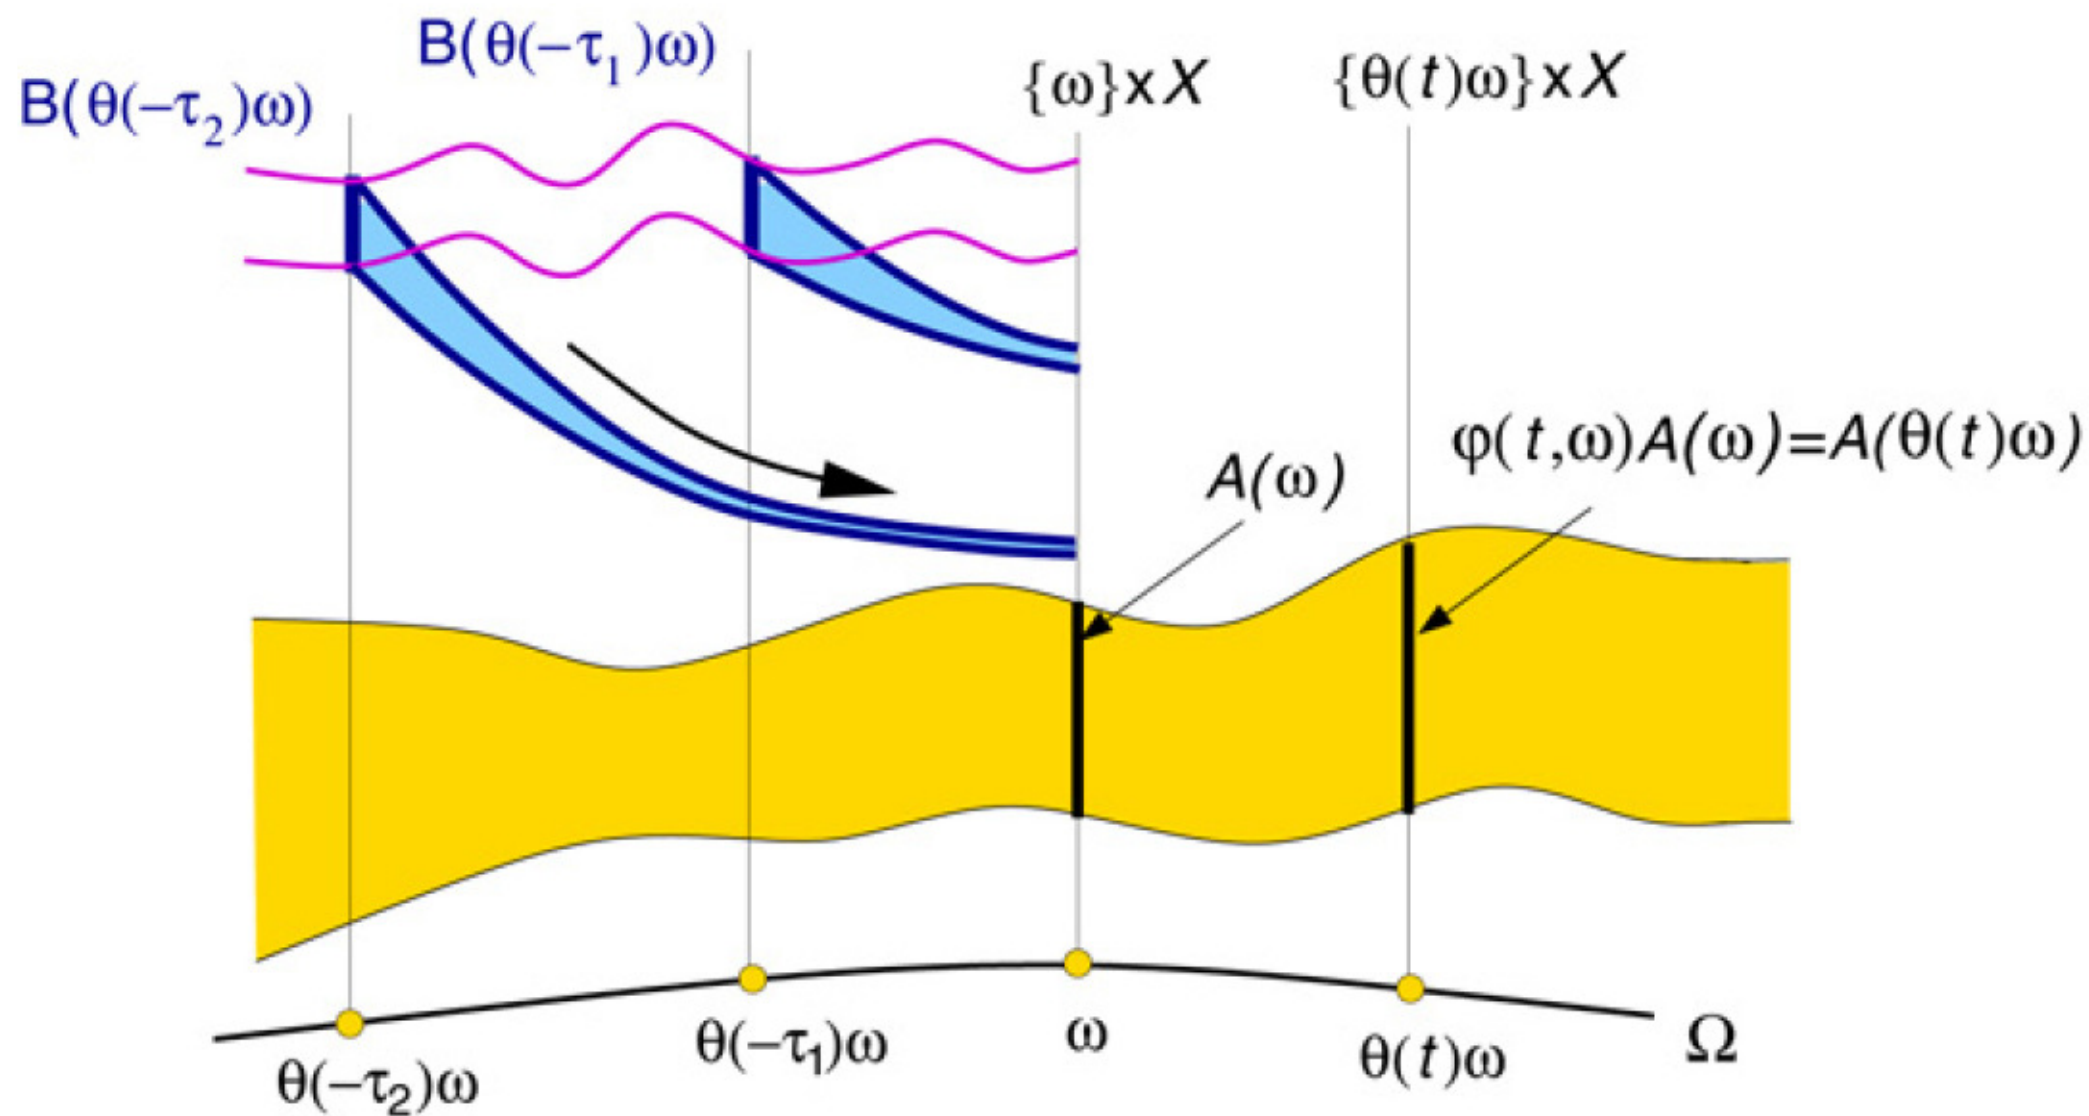

Supplement: Supplementary file 1 [file npg-30-399-2023-supplement.pdf]
